# Supplementary material for: Interrogation of the microenvironmental landscape in spinal ependymomas reveals dual functions of tumor-associated macrophages
Source: PubMed Central journal article supplement (PMC8617028; doi:10.1038/s41467-021-27018-9), 2021-11-25
Supplement: 41467_2021_27018_MOESM2_ESM.pdf [file 41467_2021_27018_MOESM2_ESM.pdf]

## Description of Additional Supplementary Files

Title: Supplementary Data 1.

Description: Summary of clinical information for patients collected in this study.

Related to **Fig. 1**.

Title: Supplementary Data 2.

Description: Signature genes of each non-malignant cells subset. Related to **Fig. 1**.

Title: Supplementary Data 3.

Description: Signature genes of TAM subsets. Related to **Fig. 2**.

Title: Supplementary Data 4.

Description: Hallmark pathway enrichment analyses items. Related to **Fig. 2, Fig. 5**.

Adjusted p-values were calculated by using *enrichr* function from R package clusterProfile with hypergeometric test statistical analyses.

Title: Supplementary Data 5.

Description: Summary of differentially accessible peaks between TAM subtypes. Related to **Fig. 2**. For computing differentially accessible peaks among distinct clusters, statistical analyses Wilcoxon Rank Sum test were performed using function *FindAllMarkers* of Seurat.

Title: Supplementary Data 6.

Description: Signature genes of each malignant subset in three type cancer. Related to **Fig. 4**.

Title: Supplementary Data 7.

Description: Targetable genes in malignant cells in each cancer subtypes. Related to **Fig. 4**.

Title: Supplementary Data 8.

Description: Differently expression genes in malignant cells from different cancer subtypes. Related to **Fig. 5**. Statistical analyses Wilcoxon test were performed using function *rank\_genes\_groups* of SCANPY.

Title: Supplementary Data 9.

Description: Intersection of EMT-related genes with active transcriptional signals.

Related to **Fig. 5**.

Title: Supplementary Data 10.

Description: Differently expression genes in TAMs from different cancer subtypes.

Related to **Fig. 5**. Statistical analyses Wilcoxon test were performed using function *rank\_genes\_groups* of SCANPY.
